# 1 Mechanism of Dimer Selectivity and 2 Binding Cooperativity of BRAF 3 Inhibitors

4 **Joseph Clayton<sup>1,2</sup>, Aarion Romany<sup>1</sup>, Evangelia Matenoglou<sup>3</sup>, Evripidis Gavathiotis<sup>3</sup>,**  
5 **Poulikos I. Poulikakos<sup>4</sup>, Jana Shen<sup>1</sup>**

\*For correspondence:

[jana.shen@rx.umaryland.edu](mailto:jana.shen@rx.umaryland.edu) (JS)

6 <sup>1</sup>Department of Pharmaceutical Sciences, University of Maryland School of Pharmacy,  
7 Baltimore, MD 21201, United States; <sup>2</sup>Division of Applied Regulatory Science, Office of  
8 Clinical Pharmacology, Office of Translational Sciences, Center for Drug Evaluation and  
9 Research, United States Food and Drug Administration, Silver Spring, MD 20993, United  
10 States; <sup>3</sup>Department of Biochemistry, Department of Medicine, Department of  
11 Oncology, Montefiore Einstein Comprehensive Cancer Center, Albert Einstein College of  
12 Medicine, New York, NY 10461, United States; <sup>4</sup>Department of Oncological Sciences,  
13 Icahn School of Medicine at Mount Sinai, New York, NY 10029, United States

---

14  
15 **Abstract** Aberrant signaling of BRAF<sup>V600E</sup> is a major cancer driver. Current FDA-approved RAF  
16 inhibitors selectively inhibit the monomeric BRAF<sup>V600E</sup> and suffer from tumor resistance. Recently,  
17 dimer-selective and equipotent RAF inhibitors have been developed; however, the mechanism of  
18 dimer selectivity is poorly understood. Here, we report extensive molecular dynamics (MD)  
19 simulations of the monomeric and dimeric BRAF<sup>V600E</sup> in the apo form or in complex with one or  
20 two dimer-selective (PHI1) or equipotent (LY3009120) inhibitor(s). The simulations uncovered the  
21 unprecedented details of the remarkable allostery in BRAF<sup>V600E</sup> dimerization and inhibitor  
22 binding. Specifically, dimerization retrains and shifts the  $\alpha$ C helix inward and increases the  
23 flexibility of the DFG motif; dimer compatibility is due to the promotion of the  $\alpha$ C-in conformation,  
24 which is stabilized by a hydrogen bond formation between the inhibitor and the  $\alpha$ C Glu501. A  
25 more stable hydrogen bond further restrains and shifts the  $\alpha$ C helix inward, which incurs a larger  
26 entropic penalty that disfavors monomer binding. This mechanism led us to propose an  
27 empirical way based on the co-crystal structure to assess the dimer selectivity of a BRAF<sup>V600E</sup>  
28 inhibitor. Simulations also revealed that the positive cooperativity of PHI1 is due to its ability to  
29 preorganize the  $\alpha$ C and DFG conformation in the opposite protomer, priming it for binding the  
30 second inhibitor. The atomically detailed view of the interplay between BRAF dimerization and  
31 inhibitor allostery as well as cooperativity has implications for understanding kinase signaling  
32 and contributes to the design of protomer selective RAF inhibitors.

---

## 34 Introduction

35 The mitogen activated protein kinase (MAPK) signaling cascades regulate cell growth, proliferation,  
36 and survival in mammalian cells (*Samatar and Poulikakos, 2014; Lavoie et al., 2020*). In the well-  
37 studied Ras-Raf-MEK-ERK pathway, the GTP-loaded RAS contacts RAF and induces its dimerization;  
38 the newly formed RAF dimer phosphorylates MEK which in turn phosphorylates ERK, which then  
39 phosphorylates a number of downstream proteins and regulate their functions (*Lavoie et al., 2020*).  
40 Mutations of BRAF, a kinase within the RAF family, are present in about 8% of human tumors, most

41 commonly melanoma and colorectal cancers, with the mutation V600E accounting for about 90%  
42 of them. It is believed that the wild type BRAF signals as a dimer, the BRAF<sup>V600E</sup> is able to signal  
43 as a monomer (*Poulikakos et al., 2010, 2011; Karoulia et al., 2017*). The first generation BRAF<sup>V600E</sup>  
44 inhibitors, including the current FDA-approved inhibitors, Vermurafenib, Dabrafenib, and Enco-  
45 rafenib, inhibit the monomeric BRAF<sup>V600E</sup>; however, drug resistance led to only short-term cancer  
46 remission in patients (*Poulikakos et al., 2011; Peng et al., 2015; Monaco et al., 2021; Yen et al., 2021;*  
47 *Adamopoulos et al., 2021*). In the adaptive drug resistance mechanism, RAF dimerization renders  
48 the monomer-selective inhibitors ineffective (*Poulikakos et al., 2011; Peng et al., 2015; Monaco*  
49 *et al., 2021; Yen et al., 2021; Adamopoulos et al., 2021*). To overcome the resistance, inhibitors  
50 that are either dimer selective or equipotent to both monomers and dimers have been developed  
51 and entered clinical development (*Adamopoulos et al., 2021; Cook and Cook, 2021*). Understand-  
52 ing the molecular mechanism of dimer selectivity would be valuable for the rational design of RAF  
53 inhibitors. Although several MD studies have examined the conformational dynamics of BRAF<sup>V600E</sup>  
54 monomer (*Maloney et al., 2021*), BRAF<sup>V600E</sup> in complex with the monomer-selective inhibitors (*Tse*  
55 *and Verkhivker, 2016*), and wild type RAF dimerization (*Zhang et al., 2021*), the topic of RAF dimer  
56 selectivity has not been explored.

57 The kinase domain of the BRAF monomer has a typical kinase structure: a primarily  $\beta$ -sheet N-  
58 terminal domain connected to a helical C-terminal domain by a flexible hinge (Figure 1). Like other  
59 kinases, the catalytic activity of BRAF depends on the conformation of two motifs: the  $\alpha$ C-helix,  
60 which contains the conserved residue Glu501, and the DFG motif on the activation loop (a-loop),  
61 which contains the conserved ATP-binding (via magnesium) residue Asp594. In the active state,  
62 both the  $\alpha$ C helix and DFG adopt the IN conformation, dubbed CIDI. In this state, the  $\alpha$ C helix is  
63 positioned inward such that  $\alpha$ C-Glu501 and the catalytic Lys483 form a salt bridge; meanwhile the  
64 DFG motif is also IN, meaning DFG-Asp594 is near Lys483 often in a salt-bridge distance. An in-  
65 active conformation can be achieved if either or both the  $\alpha$ C helix and DFG motif adopt an OUT  
66 state. Specifically,  $\alpha$ C-out involves an outward movement of the  $\alpha$ C helix, while DFG-out involves  
67 the sidechains of the DFG Asp594 and Phe595 exchanging regions, i.e., Phe595 facing the ATP  
68 binding site and Asp594 facing the  $\alpha$ C-helix. In the BRAF dimer, the two protomers are arranged  
69 side by side and the dimer interface involves the C-terminal end of the  $\alpha$ C helix (Figure 1). Cur-  
70 rent monomer-selective BRAF<sup>V600E</sup> inhibitors bind in the  $\alpha$ C-out conformation, whereas the dimer-  
71 selective or equipotent inhibitors bind in the  $\alpha$ C-in conformation (Supplemental Table 1). Thus, the  
72  $\alpha$ C conformation has been the center of attention in numerous structural and biochemical studies  
73 to understand RAF signaling and inhibitor activities (*Rajakulendran et al., 2009; Thevakumaran*  
74 *et al., 2015; Karoulia et al., 2016*).

75 In a recent study, Gavathiotis and coworkers discovered a modification to the dimer-compatible  
76 inhibitor Ponatinib which can increase the dimer selectivity by more than three fold (*Cotto-Rios*  
77 *et al., 2020*). The novel inhibitor, named Ponatinib hybrid inhibitor 1 (PHI1), extends the head-  
78 group of Ponatinib by replacing the methylpiperazine with the 4-(2-aminoethyl) morpholino group.  
79 Remarkably, PHI1 showed more potent inhibition of the second protomer in the BRAF<sup>V600E</sup> dimer;  
80 in contrast, Ponatinib and equipotent inhibitors, e.g., LY3009120 or LY, AZ-628, and TAK-632, are  
81 non-cooperative (*Cotto-Rios et al., 2020*). The co-crystal structure of BRAF<sup>V600E</sup> in complex with  
82 PHI1 (PDB: 6P7G) (*Cotto-Rios et al., 2020*) revealed that the morpholine group extends the ligand-  
83 kinase interaction from the type-II pocket (occupied by all DFG-out inhibitors) to the center of  $\alpha$ C  
84 helix, allowing a hydrophobic interaction with Asn500 next to the  $\alpha$ C-Glu501 (Figure 1). The co-  
85 crystal structures show that this interaction is not available with the shorter Ponatinib (PDB ID:  
86 6P3D) (*Cotto-Rios et al., 2020*) or equipotent inhibitors, e.g., LY3009120 (LY, PDB ID: 5C9C) (*Peng*  
87 *et al., 2015*). Gavathiotis and coworkers noticed that PHI1 stabilizes the  $\alpha$ C helix in a slightly dif-  
88 ferent IN conformation as compared to Ponatinib and hypothesized that the additional interaction  
89 with Asn500 is a key to the dimer selectivity of PHI1, as it may be unfavorable in monomer binding  
90 (*Cotto-Rios et al., 2020*). Shortly after, a biochemical study supported by the molecular dynamics  
91 (MD) simulations suggested that restriction of the  $\alpha$ C helix movement is the basis for the differ-

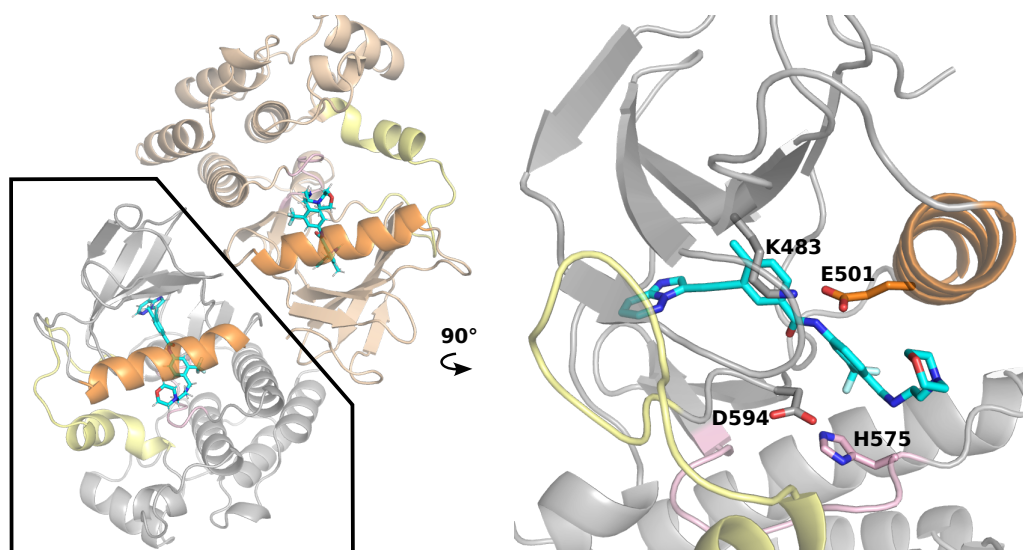

**Figure 1. The X-ray structure of the BRAF<sup>V600E</sup> dimer in complex with PHI1.** **Left.** Cartoon representation of the BRAF<sup>V600E</sup> dimer in complex with PHI1 (PDB: 6P7G *Cotto-Rios et al. (2020)*, two protomers are colored tan and grey). The  $\alpha$ C-helix, a-loop, and c-loop are colored orange, yellow, and pink, respectively. **Right.** A zoomed-in view of a PHI1-bound protomer. PHI1 and the sidechains of DFG-Asp594,  $\alpha$ C-Glu501, catalytic Lys483, and HRD-His574 are shown as sticks.

92 ence between dimer-selective and equipotent inhibitors (*Adamopoulos et al., 2021*); however, the  
93 detailed mechanism remains elusive.

94 Prompted by the open questions regarding dimer selectivity and binding cooperativity of BRAF<sup>V600E</sup>  
95 inhibitors, we carried out a series of all-atom molecular dynamics (MD) simulations to investigate  
96 the conformational dynamics of the monomeric and dimeric BRAF<sup>V600E</sup> in the presence and ab-  
97 sence of one or two dimer-selective (PHI1) or equipotent (LY) inhibitor(s). Analysis of the simula-  
98 tion data which amounts to 135  $\mu$ s aggregate time uncovered the atomic details of the remark-  
99 able conformational allostery in BRAF<sup>V600E</sup> dimerization and inhibitor binding. Supported by the  
100 co-crystal structure analysis of the published monomer-selective, dimer-selective, and equipotent  
101 inhibitors, an atomically-detailed mechanism emerged that explains the monomer or dimer selec-  
102 tivity and binding cooperativity of BRAF<sup>V600E</sup> inhibitors. The mechanism also led us to propose an  
103 empirical method based on the co-crystal structure for assessing the dimer selectivity of BRAF<sup>V600E</sup>  
104 inhibitors.

## 105 Results and Discussion

### 106 Analysis of the co-crystal structures suggests the h-bond formation with $\alpha$ C-Glu501 107 as a key requirement for dimer binding

108 To understand the preference of BRAF<sup>V600E</sup> inhibitors for the monomer vs. dimer form, we first  
109 examined all published co-crystal structures in complex with the monomer-selective and dimer-  
110 compatible (i.e., dimer-selective and equipotent) inhibitors (see Supplementary table 1 for a com-  
111 plete list). We first noticed that the monomer-selective inhibitors, e.g., Vemurafenib (VEM, PDB  
112 ID: 5JRQ) (*Grasso et al., 2016*), do not occupy BP-III, whereas most dimer-compatible inhibitors do.  
113 This can be explained by the observation that the monomer-selective inhibitors bind in the DFG-in,  
114 whereas most dimer-compatible inhibitors bind in the DFG-out conformation—BP-III is occupied by  
115 Phe595 in the DFG-in conformation, so the pocket is only available in the DFG-out conformation  
116 (Figure 2a). Note, the equipotent inhibitor SB590885 (PDB ID: 2FB8) (*King et al., 2006*) does not  
117 occupy BP-II or BP-III, as it binds in the DFG-in conformation (Supplementary table 1).

118 The co-crystal structure analysis revealed an important distinction between the monomer-selective  
119 and dimer-compatible inhibitors, namely, the former binds in the  $\alpha$ C-out whereas the latter binds

120 in the  $\alpha$ C-in conformation. The interaction fingerprints showed that while most monomer-selective  
121 inhibitors make a hydrophobic contact with Leu505 next to the conserved RKTR motif at the end  
122 of the  $\alpha$ C helix, only the dimer-compatible inhibitors interact with  $\alpha$ C-Glu501 by donating a h-bond  
123 (e.g., from an amide group in PHI1 and LY) to the carboxylate sidechain of Glu501 (Figure 2b).  
124 Glu501 rests above BP-II in the DFG-out conformation (called BP-II-out) and may interact with the  
125 catalytic Lys483 (see later discussion), which makes up a part of BP-I. Interestingly, even though  
126 SB590885 binds in the DFG-in conformation, it can also donate a h-bond to Glu501 through an  
127 oxime hydroxyl group (PDB ID: 2FB8) (*King et al., 2006*). This h-bond stabilizes the salt-bridge be-  
128 tween the catalytic Lys483 and Glu501 such that the  $\alpha$ C helix position is further inward (according  
129 to the KLIFs definition, see later discussion) as compared to the co-crystal structures in complex  
130 with other dimer-compatible inhibitors (Supplementary Table 1).

131 All monomer-selective and dimer-compatible inhibitors interact with the DFG-Asp594 although  
132 with subtle differences. In PHI1 (PDB ID: 6P7G) and LY (PDB ID: 5C9C), the amide carbonyl occupy-  
133 ing the BP-II accepts a h-bond from the backbone amide of Asp594, while in VEM (PDB ID: 4RZV)  
134 (*Grasso et al., 2016*) the sulfonamide occupying the BP-II donates a h-bond to the backbone amide  
135 of Asp594 (orange in Figure 2a). One unique property of PHI1 is the ability to donate a h-bond to  
136 the backbone carbonyl of HRD-His574 through an amino nitrogen next to the morpholine head-  
137 group. This region is classified as BP-IV by KLIFS, although the sidechain of His574 is a part of  
138 BP-II (in PDB 6P7G) and makes a h-bond with the backbone of the DFG-1 Gly593. Among the other  
139 dimer-compatible inhibitors, only Ponatinib (PDB ID: 6P3D) (*Cotto-Rios et al., 2020; Adamopoulos*  
140 *et al., 2021*) makes a similar h-bond with the backbone of His574 through the methyl pyrazine  
141 headgroup.

142 In addition to analyzing the co-crystal structures, we also tested the inhibition of ERK1/2 phos-  
143 phorylation in two melanoma cell lines by PHI1, LY, or VEM (Figure 2c,d). SKMEL239 expresses  
144 monomeric BRAF<sup>V600E</sup>, while SKMEL239-C4 expresses dimeric BRAF<sup>V600E</sup> (*Cotto-Rios et al., 2020*).  
145 Among the three inhibitors tested, PHI1 is the only compound to be more potent against SKMEL239-  
146 C4 versus SKMEL239 (IC<sub>50</sub> of 256 nM vs. 1.5  $\mu$ M). By contrast, LY has similar potency (27 nM vs. 15  
147 nM) while VEM is more potent against SKMEL239 (3  $\mu$ M vs 35 nM). This data confirms that PHI1 is  
148 dimer-selective, LY equipotent, and VEM monomer-selective.

149 In light of the above finding and given the central location of Glu501 on the  $\alpha$ C helix, we hypoth-  
150 esized that the ability to form a h-bond with Glu501 is required by dimer-compatible inhibitors, as  
151 the h-bonding would restrict the  $\alpha$ C helix to the  $\alpha$ C-in conformation as observed in the co-crystal  
152 structures of all dimer-compatible inhibitors. This restriction was also suggested as a key for dimer  
153 selectivity in the recent study by Poulikakos and coworkers (*Adamopoulos et al., 2021*). However,  
154 the crystal structures do not provide an explanation for why the ability to induce the  $\alpha$ C-in confor-  
155 mation enables the inhibitor to favor dimeric BRAF<sup>V600E</sup> over monomeric BRAF<sup>V600E</sup>. Thus, to test  
156 the hypothesis regarding the role of h-bond with the Glu501 and to dissect the mechanism of dimer  
157 selectivity, we conducted a series of MD simulations of the monomeric and dimeric BRAF<sup>V600E</sup> in  
158 the absence and presence of two dimer-compatible inhibitors (see below).

### 159 **Overview of the MD simulations of the monomeric and dimeric BRAF<sup>V600E</sup>**

160 The dimer interface of BRAF<sup>V600E</sup> contains two histidines, His477 and His510. His510 forms a h-  
161 bond with His477 of the opposite protomer, while His477 is also in a potential salt bridge distance  
162 from Asp595 of the opposite protomer (Supplemental Figure 2). In a preliminary simulation, where  
163 all histidines were set to be neutral and in a tautomer state determined by inspection of the X-ray  
164 structure (His477 was set to HID; all others set to the AMBER (*Case et al., 2020*) default HIE), we  
165 found the BRAF<sup>V600E</sup> dimer dissociated within a few hundred nanoseconds. To rigorously determine  
166 protonation states, we applied the all-atom continuous constant pH molecular dynamics (CpHMD)  
167 titration (*Harris et al., 2022*), which revealed that His477 is most likely in the charged HIP state  
168 while His510 is most likely in the neutral HIE state at neutral pH (Supplemental Figure 3,4).

169 Based on the CpHMD determined protonation states, we carried out a series of fixed-charge

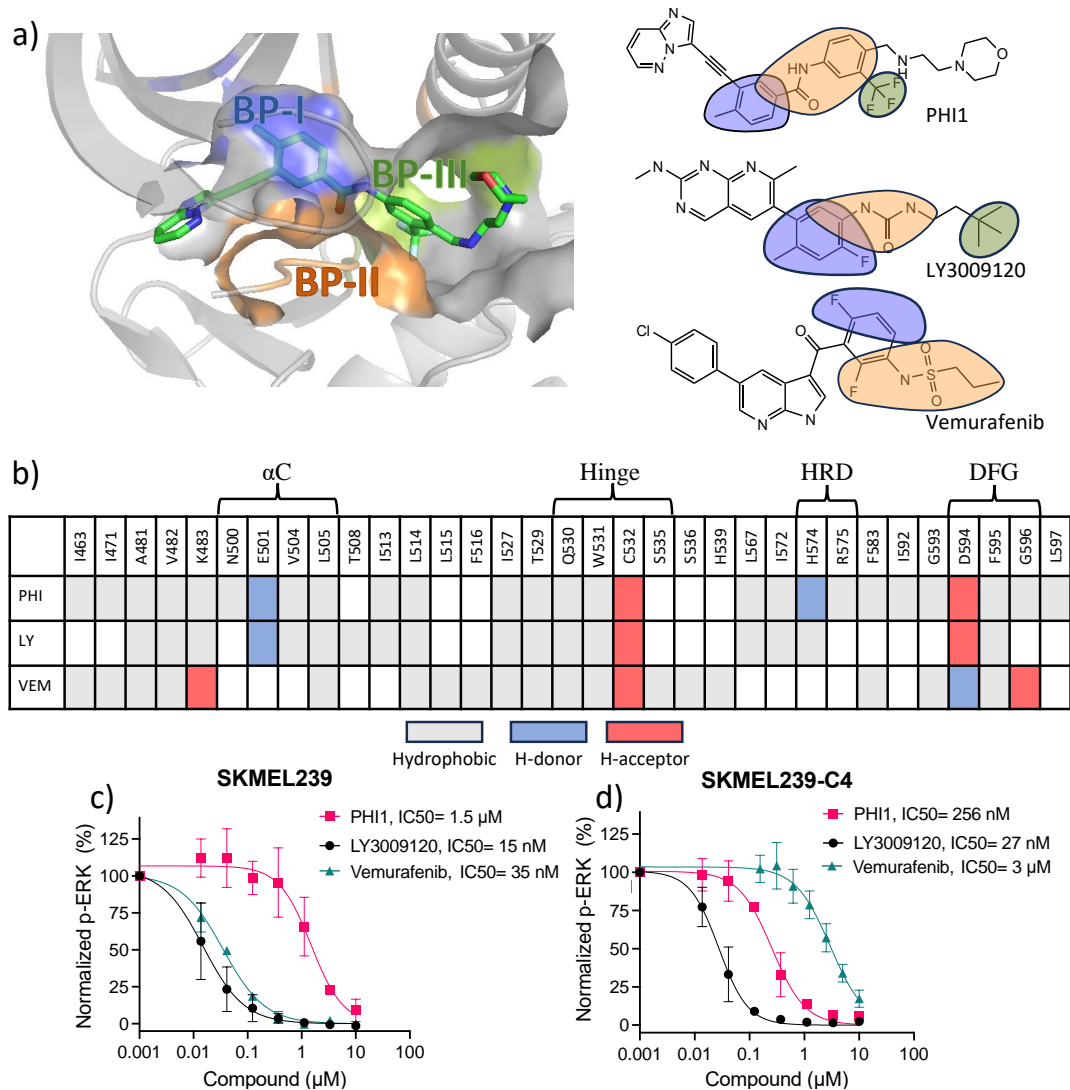

**Figure 2. Protein-ligand interaction fingerprints for PHI1, LY3009120, Vemurafenib, and the inhibition of ERK1/2 phosphorylation in melanoma cells. a) Left.** Visualization of the back pockets (BPs) in BRAF<sup>V600E</sup> in complex with PHI1. BP-I, BP-II, and BP-III are colored blue, orange, and green, respectively. BP definitions of Liao (*Liao, 2007*) are followed. **a) Right.** Chemical structures of the example dimer selective (PHI1), equipotent (LY3009120 or LY), and monomer selective (Vemurafenib or VEM) inhibitors of BRAF<sup>V600E</sup>. Portions of structures are highlighted according to the BPs they occupy in the co-crystal structure (PDB IDs: 6P7G, 5C9C, and 4RZV). **b)** Protein-ligand interaction fingerprints for PHI1, LY, and VEM in BRAF<sup>V600E</sup> according to the co-crystal structures (PDB IDs: 6P7G, 5C9C, and 4RZV). White indicates no interaction, while grey, blue, and red indicate hydrophobic, h-bond donor (H-donor) and acceptor (H-acceptor) interactions, respectively. These interactions were calculated by KLIFS (*Kooistra et al., 2016*) and manually verified and corrected. A h-bond was defined using the donor-accept distance cutoff of 3.5 Å, and a hydrophobic contact cutoff of 4 Å was used for aromatic interactions and 4.5 Å for non-aromatic interactions. For simplicity, aromatic face-to-face interactions are indicated as hydrophobic. An extensive list of monomer-selective and dimer-compatible inhibitors with co-crystal structures is given in Supplemental Table 1. **c,d)** Inhibition of ERK1/2 T202/Y204 phosphorylation in SKMEL239 (c) and SKMEL239-C4 (d) melanoma cells (50,000 cells/well) following one hour treatment at 37°C by PHI1, LY3009120, and Vemurafenib in different concentrations. Normalized values and non-linear regression fits of ERK phosphorylation % are shown for different compounds. Error bars represent mean $\pm$ SEM with n=3.



170 MD simulations of the monomeric and dimeric BRAF<sup>V600E</sup> in the ligand-free state (apo) or in complex  
171 with the PHI1 or LY inhibitor in each protomer (holo). To investigate the cooperativity of inhibitor  
172 binding, MD simulations were also conducted where only one protomer is complexed with the PHI1  
173 or LY inhibitor (mixed). Each simulation lasted 5  $\mu$ s and was repeated three times for statistical  
174 significance; in total, 135  $\mu$ s trajectory data was collected (Table 1) and the last 3  $\mu$ s of each repeat  
175 was used for analysis.

### 176 **Dimerization restrains and shifts $\alpha$ C inward while increasing the flexibility of DFG**

177 In order to understand why an inhibitor prefers binding with a dimer or monomer BRAF<sup>V600E</sup>, it  
178 is important to understand the difference in the conformation and dynamics between the apo  
179 monomeric and dimeric BRAF<sup>V600E</sup>. We focus on the  $\alpha$ C helix and DFG motif due to their flexibility  
180 and importantly specific interactions with the inhibitors (Figure 2). Following KLIFS (*Kanev et al.*,  
181 **2020**), the  $\alpha$ C position is characterized by the distance between Ile582 on  $\beta$ 7 (representing a stable  
182 reference point) and the center of mass of the C $\alpha$  atoms of Asn500, Glu501, and Val502 (represent-  
183 ing the center of the  $\alpha$ C helix); a distance below 19.6 Å defines the  $\alpha$ C-in while a distance above  
184 defines the  $\alpha$ C-out states. We also examined the salt-bridge formation between the  $\alpha$ C-Glu501  
185 and catalytic Lys483; a minimum sidechain distance below 4.5 Å is an alternative way to define the  
186  $\alpha$ C-in states (*Tsai et al.*, **2019**; *Sultan et al.*, **2018**). These two definitions are consistent and offers  
187 complementary information (see later discussion). The holo PHI1-bound structure (PDB: 6P7G) has  
188 both protomers resolved with the  $\alpha$ C positions of 19.1 and 19.0 Å, suggesting that the  $\alpha$ C helix is in  
189 but close to the boundary (19.6 Å) with  $\alpha$ C-out according to the KLIFS definition (*Kanev et al.*, **2020**).

190 Unlike in the co-crystal structures of dimer-compatible inhibitors, the simulations of the apo  
191 monomer and dimer revealed that the  $\alpha$ C helix mostly samples the  $\alpha$ C-out state. Compared to  
192 the apo monomer, the  $\alpha$ C position is not only more restrained but also shifted inward by about  
193 1 Å in the apo dimer, as seen from the increase of the peak height and the left-shift of the peak  
194 position in the probability distributions, from 23.2 to 22.0 Å (Figure 3a). The flexibility of the  $\alpha$ C  
195 position in the apo BRAF<sup>V600E</sup> is consistent with a previous MD study (*Maloney et al.*, **2021**) Enabled  
196 by the  $\alpha$ C inward movement, the probability of salt-bridge formation between Glu501 and Lys483 is  
197 increased by two-fold in the apo dimer (~25%) relative to the apo monomer (~12%, Figure 3b). The  
198 enhanced but nonetheless unstable Glu501-Lys483 salt bridge indicates that dimerization primes  
199 the  $\alpha$ C-helix for adopting the  $\alpha$ C-in state, e.g., upon interacting with a dimer-compatible inhibitor.

200 In contrast to the  $\alpha$ C helix, the motion of the DFG motif is significantly enhanced, as evident from  
201 the significant widening of the probability distribution of the DFG pseudo dihedral (Figure 3c), de-  
202 fined by the C $\alpha$  atoms of Ile592 (DFG-2), Gly593 (DFG-2), Asp594 (DFG-Asp), and Phe595 (DFG-Phe)  
203 (*Möbitz*, **2015**). Based on a cutoff of 140°, the DFG pseudo dihedral has been found to discriminate  
204 between the DFG-in and DFG-out states of kinases (*Möbitz*, **2015**; *Tsai et al.*, **2019**). Accordingly,  
205 the distributions indicate that the DFG motif samples the DFG-out state in both apo monomer and  
206 dimer, with the DFG pseudo dihedral of ~210°; however, the dimeric DFG is capable of occasion-  
207 ally sampling the DFG-in state due to the increased flexibility (Figure 3c). While this does suggest  
208 dimerization loosens the DFG motif, our simulations do not appropriately model the DFG-out/in  
209 transition as the DFG-in state is only occasionally sampled.

### 210 **PHI1 and LY binding induces the $\alpha$ C-in state to varying degrees and shifts DFG out**

211 Having understood how dimerization modulates the conformational dynamics of the  $\alpha$ C helix and  
212 DFG motif, we proceeded to explore conformational changes induced by the dimer-compatible  
213 inhibitors PHI1 and LY. Interestingly and as expected, both inhibitors further restrain the motion  
214 of the  $\alpha$ C helix, with its position sampling a narrower range of 4 Å, as compared to 7 Å in the apo  
215 dimer (Figure 3d). Importantly, the  $\alpha$ C position is shifted inward by at least 2.7 Å in the holo relative  
216 to the apo dimer, and PHI1 induces a larger shift, to 18.3 Å as compared to 19.3 Å in the presence  
217 of LY (Figure 3d). The inward shift of the  $\alpha$ C helix by the two inhibitors is also reflected in the  
218 stabilization of the Glu501-Lys483 salt bridge, which is promoted in the presence of LY (60% vs.

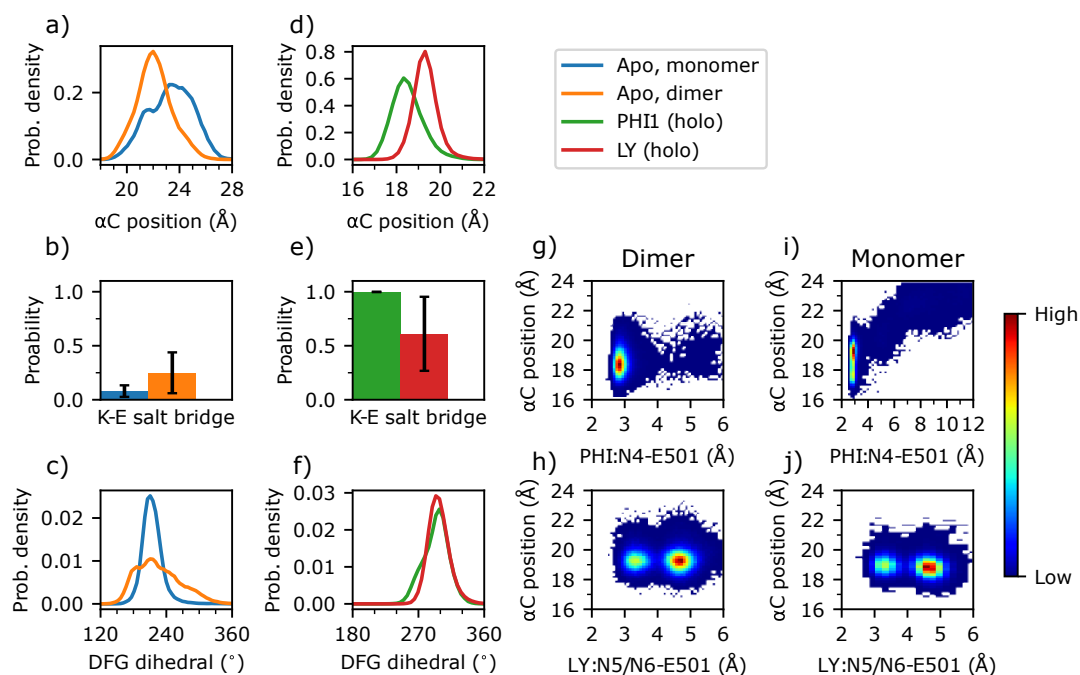

**Figure 3. Dimerization and inhibitor binding modulate the conformation and dynamics of the  $\alpha$ C-helix and DFG motif of BRAF<sup>V600E</sup>.** a-f) Probability distribution of the  $\alpha$ C position, probability of the Lys483–Glu501 salt bridge, and probability distribution of the DFG pseudo dihedral angle in the apo monomer (blue), apo dimer (orange), PHI1-bound dimer (green), and LY-bound dimer BRAF<sup>V600E</sup>. The  $\alpha$ C position is defined by the distance between the C $\alpha$  of Ile582 on  $\beta$ 7 and the C $\alpha$  center of mass of Asn500, Glu501, and Val502 (Kanev *et al.*, 2020). A salt bridge between Lys483 and Glu501 is defined by a cutoff distance of 4 Å between the nitrogen of Lys483 and the nearest carboxylate oxygen of Glu501; the standard deviation of the probability across replicas are shown as error bars. The DFG pseudo dihedral is defined by the C $\alpha$  atoms of Ile592, Gly593, Asp594, and Phe595 (Möbitz, 2015). g-j) Density plots of the  $\alpha$ C position vs. the minimum distance between Glu501 and the amide group of PHI1 (g,i) or LY (h,j) in the holo dimer (g,h) or holo monomer (i,j) BRAF<sup>V600E</sup>.

219 25% in the apo dimer) and is completely locked in the presence of PHI1 (Figure 3e). Although the  
 220 DFG motif is also significantly restrained through inhibitor binding, the DFG pseudo dihedral in the  
 221 holo dimer is shifted outward by 80° in complex with either PHI1 or LY (210° in the apo dimer vs.  
 222 290° in the holo dimer, Figure 3f).

### 223 H-bond formation with Glu501 is critical for dimer selectivity by shifting $\alpha$ C helix 224 inward

225 The monomer-selective inhibitors do not contact the center of the  $\alpha$ C helix and their co-crystal  
 226 structures only adopt  $\alpha$ C-out state (Figure 2b). To test our hypothesis that the h-bond formation  
 227 with Glu501 is critical for restricting the  $\alpha$ C helix to the  $\alpha$ C-in states, we examined the density plots  
 228 of the  $\alpha$ C position vs. the distance between the amide nitrogen of PHI1 or LY and the carboxylate  
 229 of Glu501 in the holo dimer simulations (Figure 3g,h). In the PHI1-bound dimer simulations, the  
 230 PHI1–Glu501 h-bond is stable with only occasional breakages, as seen from the density maximum  
 231 centered at the N4–Glu501 distance of 2.9 Å and  $\alpha$ C position  $\sim$ 18 Å (Figure 3g). In the LY-bound  
 232 dimer simulations, however, the LY–Glu501 h-bond is weaker and less stable than the counterpart  
 233 of the PHI1-bound dimer, as seen from the local density maximum centered at  $\sim$ 3.4 and the global  
 234 maximum near *sim*4.5 Å (Figure 3g,h). The stronger h-bond between PHI and Glu501 may be at-  
 235 tributed to the additional hydrophobic interaction PHI1 forms with Asn500, which is absent for LY  
 236 (Figure 2b). It is also noteworthy that when the PHI1–Glu501 interaction switches from h-bonding  
 237 to van der Waals interaction, the  $\alpha$ C position is slightly shifted outward to  $\sim$ 19 Å, which is similar to  
 238 the position adopted in the LY-bound dimer simulations. This suggests that the stronger h-bond

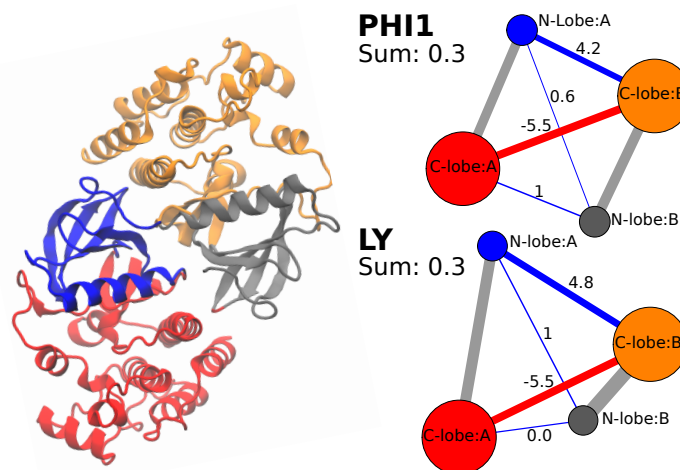

**Figure 4. Both PHI1 and LY stabilize the interprotomer contacts of BRAF<sup>V600E</sup>.** **Left.** The N-lobe (blue for A; grey for B) and C-lobe (red for A; orange for B) of each protomer in the BRAF<sup>V600E</sup> dimer are separated into different communities according to the difference contact network analysis (Yao *et al.*, 2018). **Right.** The average number of interprotomer contacts was calculated for the apo and holo BRAF<sup>V600E</sup> dimer. (PHI1 top or LY(bottom)). The difference between the holo and apo contacts is shown in the graph form for PHI1 (top) and LY (bottom), and the sum (0.3) is given. Interprotomer contacts are shown as blue (more contacts in holo simulations) or red (more contacts in apo simulations) edges. The difference contact network analysis was performed using the dCNA program (Yao *et al.*, 2018). The cutoff distance defining a contact was 4.5 Å; the threshold for determining a stable contact was set to 0.7, and the number of communities was set to 4.

239 between PHI1 Glu501 may contribute to the inward  $\alpha$ C position as compared to the LY-bound  
240 dimer.

241 To further dissect the mechanism of dimer selectivity, we examined the h-bond interaction  
242 between PHI1 or LY and Glu501 in inhibited monomer BRAF<sup>V600E</sup> simulations. Strikingly, the PHI1-  
243 Glu501 interaction can become completely disrupted, with the distance moving beyond 6 Å to  
244 as high as 12 Å; correlated with the disruption of the PHI1-Glu501 interaction, the  $\alpha$ C position is  
245 shifted out to the range of 21 Å–24 Å, similar to that sampled by the apo dimer (Figure 3i). In stark  
246 contrast, the LY-Glu501 interaction remains stable as in the holo dimer simulations (Figure 3j).  
247 These data are consistent with the previous simulations of the LY- and regorafenib (REG)-bound  
248 monomeric and dimeric BRAF<sup>V600E</sup> based on different force fields, which showed that the root-  
249 mean-square deviation (RMSD) of the dimer-selective REG is increased in the monomer compared  
250 to dimer simulations, whereas the RMSD of the equipotent LY remains the same (Adamopoulos  
251 *et al.*, 2021).

252 The correlation between the  $\alpha$ C position and the LY-Glu501 interaction confirms our hypoth-  
253 esis that the h-bond interaction between the inhibitor and Glu501 is a key for restraining the  $\alpha$ C  
254 helix and shifting it to the  $\alpha$ C-in states. Since dimerization already restricts the motion of the  $\alpha$ C  
255 helix and shifts it inward in the apo dimer, inhibitors capable of interacting with Glu501 can bind  
256 to the dimer via a conformational selection mechanism in addition to induced fit. On the other  
257 hand, conformational selection cannot be exploited for these inhibitors to bind the monomer, as  
258 the  $\alpha$ C position in the apo monomer is outward. Compared to the equipotent inhibitors, the dimer-  
259 selective inhibitors such as PHI1 form much stronger h-bond with Glu501, which shifts the  $\alpha$ C helix  
260 further inward. The latter may lead to a larger entropic penalty for the monomer binding as com-  
261 pared to the equipotent inhibitors.

262 **PHI1 or LY binding has similar stabilizing effect on the dimer interface of BRAF<sup>V600E</sup>**

263 The aforementioned data demonstrates the importance of considering entropic penalty in monomer  
264 binding as a contributor to dimer selectivity. To rule out the possibility that the different degree



265 of dimer (de)stabilization may also be a contributing factor for dimer selectivity, we turned to the  
266 difference contact network analysis (Yao *et al.*, 2018). In this analysis, the BRAF<sup>V600E</sup> dimer was  
267 first partitioned into four different communities based on the the residue-residue contacts, which  
268 resulted in each community largely corresponding to the N-lobe (blue or grey) and C-lobe (red or  
269 orange) of either protomer (Figure 4 left). Then, a community-community difference contact net-  
270 work between the apo and holo dimer simulation sets was calculated and mapped onto a graph,  
271 where the vertices represent the communities and blue and red edges represent the increased and  
272 decreased contact probabilities due to inhibitor binding (Figure 4 right). Since we are interested  
273 in testing the dimer stability in the presence of PHI1 or LY, the interprotomer contact probabili-  
274 ties (between N-lobe:A and N-lobe:B or C-lobe:B; between C-lobe:A and C-lobe:B or N-lobe:A) were  
275 calculated and summed up. Interestingly, for both PHI1 and LY, the total interprotomer contact  
276 probability is increased (by 0.3) in the holo relative to the apo simulations. This net increase is  
277 mainly due to the N-lobe:A to C-lobe:B interactions which compensates for the decrease in the C-  
278 lobe:A to C-lobe:B contacts. This analysis demonstrates that both the dimer-selective and equipo-  
279 tent inhibitors have the same slightly stabilizing effect on the BRAF<sup>V600E</sup> dimer interface; this rules  
280 out the possibility that the dimer selectivity is due to the different degree of dimer stabilization  
281 between the dimer-selective and equipotent inhibitors.

### 282 **Positive cooperativity of PHI1 is due to the allosteric modulation of the $\alpha$ C and DFG** 283 **conformation in the opposite protomer**

284 As previously mentioned, PHI1 was found to exert a more potent inhibition of the second pro-  
285 tomers of the BRAF<sup>V600E</sup> dimer whereas LY demonstrated similar potency in the inhibition of the  
286 two protomers (Cotto-Rios *et al.*, 2020). To shed light on this cooperativity mechanism, we exam-  
287 ined the simulations of the mixed BRAF<sup>V600E</sup> dimers in which only one protomer is in complex with  
288 PHI1 or LY. We first compared the  $\alpha$ C helix position of the apo protomer in the mixed dimers (Fig-  
289 ure 5a). Surprisingly, the  $\alpha$ C helix of the apo protomer in the PHI1-bound mixed dimer is restrained  
290 and shifted inward by 1 Å relative to the apo dimer; in contrast, the position of the corresponding  
291  $\alpha$ C helix in the LY-bound mixed dimer remains the same but becomes slightly more flexible (blue  
292 and grey, Figure 5a left). Because of the inward shift of the  $\alpha$ C helix in the PHI1-bound mixed dimer,  
293 the Glu501 of the apo protomer has a 25% higher probability of forming a salt bridge with Lys483 as  
294 compared to the apo dimer; in contrast, the salt-bridge probability for the corresponding Glu501 in  
295 the LY-bound mixed dimer remains the same as in the apo dimer (blue and grey, Figure 5a middle).  
296 These data demonstrate that PHI1 binding in one protomer allosterically modulates the  $\alpha$ C helix  
297 in the second apo protomer such that it moves inward and becoming more favorable for binding  
298 the second PHI1.

299 From the distributions of the DFG pseudo dihedral, we can see a slight right shift in the peak  
300 position for the DFG in the apo protomer of the PHI1-bound mixed dimer relative to the apo dimer  
301 (blue and grey, Figure 5a right). Although the shift is small (the differences between means is ap-  
302 proximately one standard deviation, see Supplementary Table 2), it suggests that PHI1 binding  
303 in one protomer can allosterically shift the DFG motif outward, making it favorable for binding a  
304 second inhibitor. In contrast, the DFG dihedral of the apo protomer in the LY-bound mixed dimer  
305 appears to be slightly smaller than the apo dimer with difference between means of approximately  
306 one standard deviation (Supplementary Table 2), which is unfavorable for binding the second in-  
307 hibitor (orange and grey, Figure 5a right). The flexibility of the DFG motif in the apo protomer of  
308 the PHI1- or LY-bound mixed dimers is the same as in the apo dimer.

309 Next, we compared the  $\alpha$ C helix position in the holo protomer of the mixed dimers (Figure 5b  
310 left). Remarkably, the  $\alpha$ C helix in the PHI1-bound protomer of the mixed dimer (blue) is shifted  
311 outward by  $\sim 1$  Å relative to the holo dimer bound to two PHI1 (green, Figure 5b left), demonstrating  
312 that the second PHI1 binding allosterically shifts the  $\alpha$ C helix further inward. Further analysis shows  
313 that in the holo dimer the  $\alpha$ C helix of one protomer is on average 0.5 Å closer compared to the  
314 neighboring protomer (Supplementary Table 2). Nonetheless, the Lys483–Glu501 salt bridge is

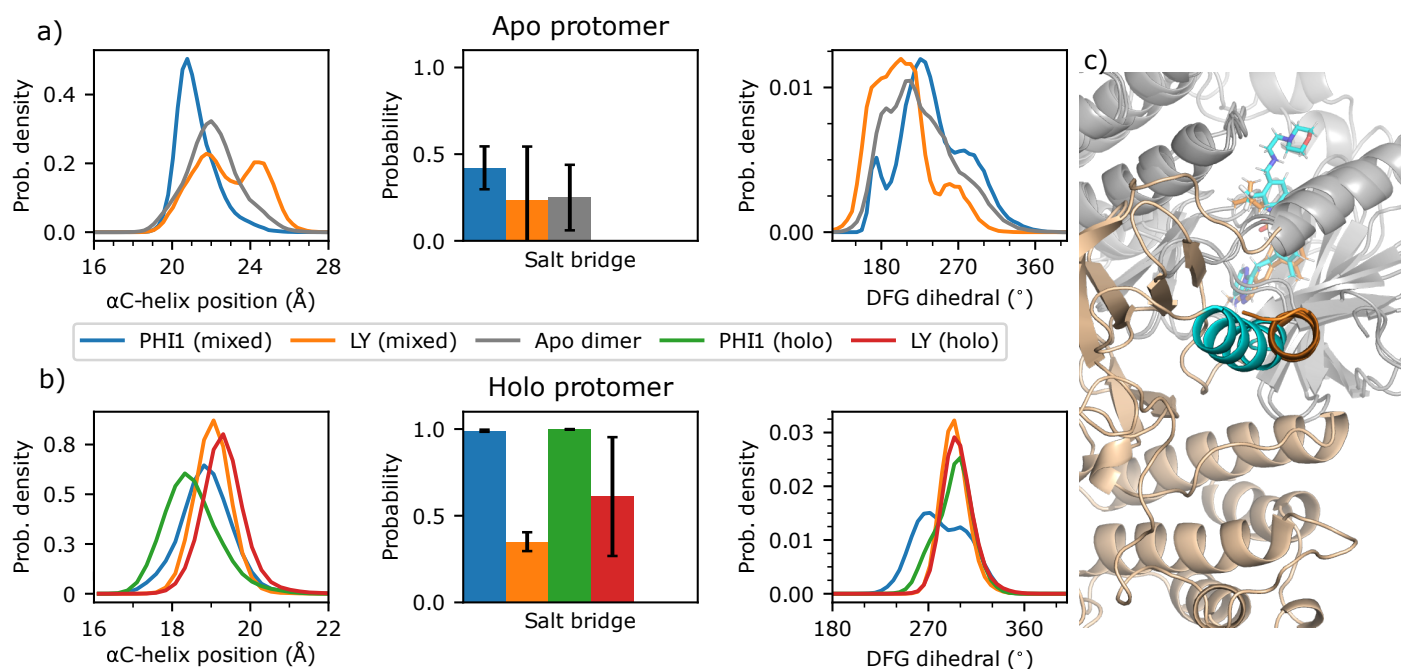

**Figure 5. Conformation of the  $\alpha$ C helix and DFG motif is dependent on the presence or absence of PHI1 in the second protomer. a)** The  $\alpha$ C helix position, probability of the Glu501–Lys483 salt bridge, and DFG pseudo dihedral of the apo protomer in the one PHI1- (blue) or one LY-bound (orange) mixed dimer simulations. As a reference, the apo dimer data is shown in grey. **b)** The same quantities as in a) but for the holo protomer in the one PHI1- (blue) or LY-bound (orange) mixed dimer simulations. As a reference, the two PHI1- and LY-bound holo dimer data are shown in green and red, respectively. The standard deviation of the probability across replicas is shown in error bars. **c)** Snapshot from both mixed dimers, after aligning the PHI1- (cyan) and LY-bound (orange) holo protomers (gray). The  $\alpha$ C-helix of the apo protomer is highlighted in cyan for PHI1-bound and orange for LY-bound mixed dimer. For simplicity, only the apo protomer from the PHI1-bound mixed dimer is shown.

315 stable in both the mixed and holo dimers; this is because the  $\alpha$ C helix predominantly samples the  
316  $\alpha$ C-in state in both cases (blue and green in Figure 5b middle). In contrast to PHI1, the  $\alpha$ C position  
317 in the LY-bound protomer of the mixed dimer is similar to that in the LY-bound holo dimer (orange  
318 and red in Figure 5b left), although the probability of the Lys483–Glu501 salt-bridge in the LY-bound  
319 protomer in the mixed dimer is slightly lower than in the holo dimer.

320 Consistent with the effect of the second PHI1 on the  $\alpha$ C position of the first PHI1 bound pro-  
321 tomer, the second PHI1 allosterically shifts the peak of the DFG probability density further outward,  
322 as shown by the 30° larger DFG pseudo dihedral in the holo dimer relative to the mixed dimer  
323 (green and blue in Figure 5b right). In contrast, there is no significant difference in the DFG pseudo  
324 dihedral between the LY-bound mixed and holo dimers. This data demonstrates that the presence  
325 of PHI1 in one protomer modulates the  $\alpha$ C and DFG conformation of the apo protomer such that  
326 the apo protomer becomes more favorable for binding.

## 327 Concluding Discussion

328 We explored the mechanism of dimer selectivity and cooperativity of BRAF<sup>V600E</sup> inhibitors using  
329 MD simulations of the dimeric and monomeric BRAF<sup>V600E</sup>, in the absence and presence of one or  
330 two dimer-selective (PHI1) or equipotent (LY) inhibitor(s). The simulations uncovered the atomic de-  
331 tails of the remarkable allostery in BRAF<sup>V600E</sup> dimerization and ligand binding (Figure 6), which offer  
332 explanation for why some BRAF inhibitors are monomer selective while others are dimer compati-  
333 ble, i.e., selective or equipotent. Specifically, our data showed that dimerization of BRAF<sup>V600E</sup> leads  
334 to the restriction and an inward shift of the  $\alpha$ C helix position relative to the monomer (Figure 6  
335 top panel), which explains why inhibitors that can stabilize the  $\alpha$ C-in states are dimer compatible  
336 whereas those that cannot are monomer selective. The fact that both dimerization and inhibitor  
337 binding induces  $\alpha$ C to move inward contributes to the phenomenon of drug-induced RAF dimer-  
338 ization (*Hatzivassiliou et al., 2010; Lavoie et al., 2013; Karoulia et al., 2016*).

339 The co-crystal structure analysis and MD simulations identified a h-bond donor (e.g., an amide  
340 linker in the dimer-selective PHI1 or the equipotent LY) as a key for dimer compatibility; the h-bond  
341 with the carboxylate of Glu501 stabilizes the  $\alpha$ C helix in the  $\alpha$ C-in states. Two factors make Glu501  
342 a special and critical anchoring point for inducing the  $\alpha$ C-in states. First, it is located at the center of  
343 the  $\alpha$ C helix, which makes it easier (as opposed to the end of the helix) to induce a helix movement.  
344 Second, the h-bonding between the inhibitor and Glu501 is synergistic with the Lys483–Glu501  
345 salt-bridge formation. In contrary, the lack of a h-bond with Glu501, e.g., in VEM, Dabrafenib, or  
346 PLX7904, results in the monomer selectivity. Note, the DFG-in inhibitors can also donate a h-bond  
347 to  $\alpha$ C-Glu501 and bind the BRAF<sup>V600E</sup> dimer. An example is SB5909885, which donates a h-bond  
348 from the oxime group to  $\alpha$ C-Glu501 and also forms a salt bridge with Lys483 (PDB ID: 2FB8) (*King*  
349 *et al., 2006*).

350 The difference between the dimer-selective and equipotent inhibitors is more subtle. The MD  
351 simulations revealed that PHI1 forms a more stable h-bond with Glu501 in the BRAF<sup>V600E</sup> dimer as  
352 compared to LY, which is consistent with the ~1 Å inward shift of the  $\alpha$ C helix and more stable  
353 Lys483–Glu501 salt bridge. The latter differences are much smaller in the co-crystal structures;  
354 the  $\alpha$ C positions and Lys483–Glu501 distances are only respectively 0.1 and 0.2 Å smaller in the  
355 PHI1- vs. LY-bound co-crystal structure. Since the monomeric BRAF<sup>V600E</sup> has a flexible  $\alpha$ C helix that  
356 predominantly samples the  $\alpha$ C-out states, forming a tighter h-bond would incur a higher entropic  
357 penalty for monomer binding. This may explain why the PHI1–Glu501 interaction as well as the  $\alpha$ C  
358 position are unstable in the monomer simulations but stable in the dimer simulations, in contrast  
359 to the LY-bound simulations. Therefore, the stability of the h-bonding with Glu501 may be a key  
360 for dimer selectivity.

361 Without the MD simulations, how would one determine if the h-bond between the inhibitor and  
362 Glu501 is stable? We found that the deviation between the  $\alpha$ C position and/or K–E distance of the  
363 two protomers in the co-crystal structure offers some indication (Supplemental Table 1). With the  
364 exception of LY and Ponatinib, the  $\alpha$ C position and/or K–E distance between the two protomers in

365 the co-crystal structures of AZ628, TAK632, BGB283, SB5909885 deviate by 0.3 Å or higher (Supple-  
366 mental Table 1). In contrast, the  $\alpha$ C position and the K-E distance are (nearly) identical between  
367 the two protomers in the co-crystal structures of the dimer-selective inhibitors LXH254, RAF709,  
368 Sorafenib, and Belvarafenib (Supplemental Table 1). The identical  $\alpha$ C position and K-E distance in  
369 the two protomers suggest that the  $\alpha$ C helix is restrained by the inhibitor, i.e. it forms a stable  
370 h-bond with Glu501.

371 To additionally test this crystal structure-based hypothesis, we examined the co-crystal struc-  
372 tures of GDC0879 and Tovorafenib, which were not analyzed in Ref (*Adamopoulos et al., 2021*).  
373 In the co-crystal structure of GDC0879 (PDB ID: 4MNF), the  $\alpha$ C position deviates by 0.3 Å and the  
374 K-E distance deviates by 0.1 Å between the two protomers. In the co-crystal structure of Tovo-  
375 rafenib (PDB ID: 6V34), the the  $\alpha$ C position deviates by 0.2 Å and the K-E distance deviates by 0.4  
376 Å between the two protomers. These deviations suggest that the  $\alpha$ C is not adequately restrained  
377 by the inhibitors and therefore we predicted GDC0879 and Tovorafenib to be equipotent. Note,  
378 GDC0879 is a DFG-in inhibitor, which is an additional indication for a equipotent inhibitor. Indeed,  
379 both GDC0879 and Tovorafenib were found as equipotent in experimental studies (*Karoulia et al.,*  
380 *2016; Tkacik et al., 2023*). These analyses led us to propose the following empirical assessment  
381 of a RAF inhibitor based on its co-crystal structure with BRAF<sup>V600E</sup>: 1) lack of a h-bond with Glu501  
382 indicates monomer selectivity; 2) presence of a h-bond with Glu501 but inconsistent  $\alpha$ C position  
383 and/or K-E distance between the two protomers indicates equipotency; 3) presence of a h-bond  
384 with Glu501 and identical  $\alpha$ C position and K-E distance between the two protomers indicates that  
385 the inhibitor is likely (but not necessarily) dimer selective. Given that the resolution of a resolved  
386 structure is often  $\sim$ 2-3 Å, this proposed assessment is not intended to replace more rigorous tests,  
387 i.e. utilizing MD simulations.

388 Finally, the MD analysis uncovered a mechanism for positive cooperativity. Our findings are  
389 summarized in Figure 6; upon dimerization (top row) the  $\alpha$ C-helix goes from  $\alpha$ C-out and highly  
390 flexible to slightly restrained and inward shifted. The mixed simulations demonstrated that the  
391 first PHI1 binding in the BRAF<sup>V600E</sup> dimer primes the second apo protomer by making the  $\alpha$ C and  
392 DFG conformation more favorable for binding, i.e., shifting the  $\alpha$ C inward and the DFG outward  
393 (Figure 6, bottom right panel). Importantly, without a second PHI1, the  $\alpha$ C and DFG conformation  
394 in the first protomer is not fully shifted in or out, respectively, as compared to the two-inhibitor  
395 bound dimer (Figure 6, bottom left panel). These data suggest that the positive cooperativity of  
396 PHI1 is due to its ability to allosterically modulate the  $\alpha$ C and DFG conformation in the second  
397 protomer. Taken together, our findings provide a mechanistic understanding for the remarkable  
398 allostery and conformational interplay between kinase dimerization and inhibitor binding. As we  
399 prepare the manuscript for submission, a biophysical experiment was published, which suggested  
400 that the first inhibitor binding dominates the allosteric coupling between type II inhibitor binding  
401 and BRAF dimerization (*Rasmussen et al., 2023*), consistent with our simulation data. The work  
402 presented here has implications for understanding the molecular mechanism of kinase signaling  
403 and contributes to the rational design of protomer-selective inhibitors.

## 404 **Methods and Protocols**

### 405 **Intracellular homogeneous TR-FRET assay**

406 SKMEL239 and SKMEL239-C4 cells were plated at 50000cells/well in white TC-treated 96-well plates  
407 in 100ul complete growth media (DMEM). Cells were incubated with the various RAF inhibitors  
408 for 1 hour at 37°C, 5% CO<sub>2</sub>. ERK phosphorylation was measured using the THUNDER™ Extreme  
409 Phospho-ERK1/2 (T202/Y204) TR-FRET Cell Signaling Assay Kit (Bioauxillium) according to directions  
410 for the Standard 2-Plate Assay Protocol for Adherent Cells. Cells were lysed for 30 minutes at RT  
411 under shaking. Lysates were transferred to a white 384-well plate, sealed and incubated with the  
412 detection mix antibody at RT for 4 hours. TR-FRET signal was measured at 615 nm and 665 nm  
413 excitation using a TECAN SPARK plate reader.

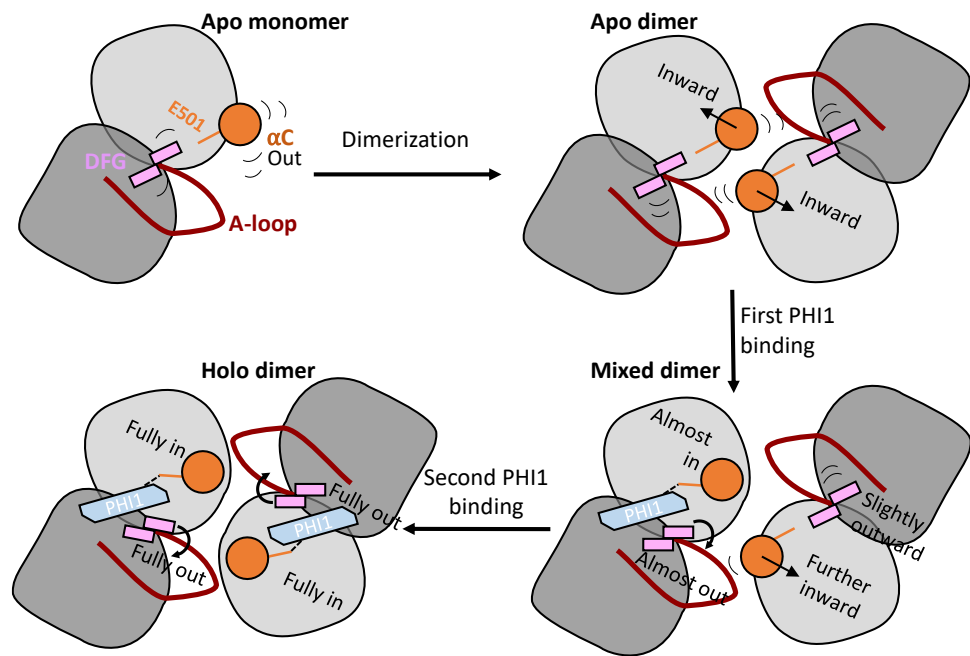

**Figure 6. A working model that explains dimer selectivity and binding cooperativity of BRAF<sup>V600E</sup> inhibitors.** **Top left.** In the monomeric BRAF<sup>V600E</sup>, the  $\alpha$ C-helix (orange) is very flexible and exclusively samples the out states. **Top right.** Upon dimerization, the  $\alpha$ C-helix is restrained and shifts inward, while the DFG-motif maintains its conformation but gains significant flexibility. **Bottom right.** When the first PHI1 molecule binds, its amide linker donates a h-bond to the carboxylate of Glu501 (orange stick) in the first protomer, which locks the  $\alpha$ C helix to the  $\alpha$ C-in state; it also shifts and restricts the DFG-motif into the DFG-out state through the interaction with the DFG-Asp backbone. The  $\alpha$ C-helix and DFG-motif in the second unbound protomer are also affected, with the  $\alpha$ C-helix shifting towards  $\alpha$ C-in while DFG-motif (slightly) moving towards DFG-out; these conformational changes are in the direction of the inhibitor-bound state. Thus, the allosteric pre-organization primes the second protomer for accepting a second PHI1 molecule. **Bottom left.** When the second PHI1 molecule binds, the  $\alpha$ C helix and DFG-motif in both protomers are shifted and fully locked into the  $\alpha$ C-in and DFG-out states.



#### 414 **System preparation for simulations**

415 Simulations were prepared using a crystal structure of BRAF<sup>V600E</sup> in complex with either PHI1 (PDB  
416 ID: 6P7G) (*Cotto-Rios et al., 2020*) or LY (PDB ID: 5C9C) (*Peng et al., 2015*). The initial structure of  
417 the apo simulations was taken from 6P7G. The a-loop is not resolved in either protomer in 5C9C,  
418 but is resolved for protomer B in 6P7G. Thus, the missing a-loop in the protomer B of 6P7G and  
419 in both protomers in 5C9C were built by rotating and translating the resolved a-loop from the  
420 first protomer using the alignment tool in PyMOL (*Schrödinger, LLC, 2015*). Chain B (which has the  
421 resolved a-loop) was first aligned to chain A using all residues except for the a-loop and the two end  
422 residues that connect it to the rest of the protein. Following the alignment, chain B except for the  
423 a-loop and its two end residues were deleted. The N-terminus was acetylated and the C-terminus  
424 was amidated. Hydrogen atoms were added using the HBUILD facility in the CHARMM package  
425 (version c37a2) (*Brooks et al., 2009*).

#### 426 **All-atom continuous constant pH molecular dynamics (CpHMD) simulations**

427 The recently developed all-atom particle mesh Ewald CpHMD (PME-CpHMD) (*Harris et al., 2022*)  
428 with the asynchronous pH replica exchange sampling protocol (*Wallace and Shen, 2011; Hender-*  
429 *son et al., 2020*) was used to determine the protonation and tautomer states of histidines. To  
430 prepare for the CpHMD simulations, the histidine residues were first set to HIP with the dummy  
431 hydrogens on the N $\delta$  and N $\epsilon$  atoms. The system was solvated in a rectangular water box with at  
432 least 10 Å distance between the protein and the boundary (~23,000 water molecules). The protein  
433 was represented by the AMBER ff14SB force field (*Maier et al., 2015*) and water by the TIP3P model  
434 (*Jorgensen et al., 1983*). The dimer structure was briefly minimized for 500 steps (first 200 were  
435 using steepest decent, following 300 used conjugate gradient) with a harmonic force constant of  
436 100 kcal/mol/Å<sup>2</sup> applied on all heavy atoms of the protein. This was followed by 100 ps of heating  
437 to 300 K using the PME-CpHMD simulations at pH 7.0 with the restraints still applied. Once heated  
438 the restraints were gradually removed in six stages: in the first two stages the protein heavy atoms  
439 were restrained with a force constant of 100 and 10 kcal/mol/Å<sup>2</sup>; in the next four stages only the  
440 backbone heavy atoms were restrained with a force constant of 10, 1.0, 0.1, and 0.0 kcal/mol/Å.  
441 Each stage was simulated for 250 ps, for a total of 1.5 ns. A cutoff of 12 Å was used for the non-  
442 bonded interactions.

443 The equilibrated structure was then used to initiate the pH replica exchange PME-CpHMD sim-  
444 ulations. The asynchronous pH replica exchange sampling protocol (*Wallace and Shen, 2011; Hen-*  
445 *derson et al., 2020*) was used to accelerate convergence of the coupled protonation and confor-  
446 mational states (*Wallace and Shen, 2011*). Five replicas were created at different pH conditions,  
447 from pH 6.5 to 8.5. Each replica was first equilibrated to its pH by repeating the final four stages  
448 of equilibration mentioned above. The pH replica exchange CpHMD was then conducted for 10  
449 ns with attempted swaps of neighboring pH conditions occurring every 2 ps. All other settings  
450 are identical to Ref. *Harris et al. (2022)*. For the calculation of protonation and tautomer state  
451 probabilities, the  $\lambda$  and  $x$  values above 0.8 or below 0.2 were used (default setting in the CpHMD  
452 analysis package (*Henderson et al., 2022*)). At pH 7.5 His477 was protonated at both N $\epsilon$  and N $\delta$   
453 while His510 was protonated at N $\epsilon$  only. These protonation/tautomeric states were used for all  
454 convention (fixed-protonation-state) simulations below.

#### 455 **Conventional fixed-protonation-state MD simulations**

456 Eight BRAF<sup>V600E</sup> systems were simulated, consisting of monomeric and dimeric BRAF<sup>V600E</sup> either in  
457 the presence or absence of PHI1 or LY (see Table 1). Monomer systems were prepared by elimi-  
458 nating one protomer from the prepared dimer structure. In the apo monomer and dimer systems,  
459 ligand(s) was removed. In the mixed or holo systems, one or both inhibitors from the co-crystal  
460 structure was kept. The protein was then placed in a rectangular water box with a minimum dis-  
461 tance of 10 Å between the protein and edges of the water box using the LEaP program (*Case et al.,*

462 **2020**). Based on the protonation states determined using CpHMD, sodium and chloride ions were  
463 added to neutralize the system and reach a physiological ionic strength of 0.15 M.

464 The conventional (fixed-protonation-state) MD simulations were carried out using the AMBER20  
465 MD package (*Case et al., 2020*). The proteins were represented by the ff14SB force field (*Maier et al.,*  
466 **2015**) while inhibitors were parameterized by the general AMBER force field (GAFF) method (*Wang*  
467 *et al., 2004*). The TIP3P model (*Jorgensen et al., 1983*) was used to represent water. The Leapfrog  
468 integrator was used to propagate the coordinates. The SHAKE algorithm was applied to bonds in-  
469 volving hydrogen to allow for a 2-fs time step. Additionally, the hydrogen mass re-partitioning (*Hop-*  
470 *kins et al., 2015*) was used to redistribute the mass between hydrogens and their bonded heavy  
471 atoms to allow for a 4-fs time step. A nonbonded cutoff of 8 Å was used as in the ff14SB validation  
472 study (*Maier et al., 2015*) while the electrostatic potentials were computed using the particle-mesh  
473 Ewald method (*Darden et al., 1993*) with a real-space cut-off of 12 Å and a sixth-order interpolation  
474 with approximately 1 Å grid spacing. Each system underwent minimization using 1000 steps of  
475 steepest descent followed by 19000 steps of conjugate gradient while the heavy atoms were har-  
476 monically restrained using a force constant of 100 kcal/mol/Å<sup>2</sup>. Following minimization, the system  
477 was heated to 300 K over 1 ns under an NVT ensemble using a Langevin thermostat (*Feller et al.,*  
478 **1995**) with collision frequency of 1 ps<sup>-1</sup> for temperature control. The systems then underwent a  
479 6-stage equilibration in which the backbone restraints were gradually reduced to 10, 5, 2, 1, 0.1  
480 and 0 kcal/mol/Å<sup>2</sup> over the course of 100 ns under a NPT ensemble. A Monte-Carlo barostat (*Case*  
481 *et al., 2020*) was used to control pressure at 1 bar using a relaxation time of 1.0 ps. Each system  
482 were run in three replicates each starting from different random velocity seeds and each run lasted  
483 5 μs.

| No. | System            | Simulation time | Starting structure        |
|-----|-------------------|-----------------|---------------------------|
| 1   | Apo monomer       | 3 x 5 μs        | 6P7G(A)                   |
| 2   | Apo dimer         | 3 x 5 μs        | 6P7G (inhibitors removed) |
| 3   | Holo monomer:PHI1 | 6 x 5 μs        | 6P7G (A:PHI1 or B:PHI1)   |
| 4   | Holo monomer:LY   | 3 x 5 μs        | 5C9C (A:LY)               |
| 5   | Mixed dimer:PHI1  | 3 x 5 μs        | 6P7G (apo A; B:PHI1)      |
| 6   | Holo dimer:2PHI1  | 3 x 5 μs        | 6P7G (A:PHI1, B:PHI1)     |
| 7   | Mixed dimer:LY    | 3 x 5 μs        | 5C9C (A:LY; apo B)        |
| 8   | Holo dimer:2LY    | 3 x 5 μs        | 5C9C (A:LY; B:LY)         |

**Table 1.** Summary of the fixed-protonation-state MD simulations (aggregate time of 135 μs)

#### 484 **Simulation data analysis.**

485 CPPTraj (*Roe and Cheatham, 2013*) was used to analyze the protomer conformation ( $\alpha$ C-helix posi-  
486 tion, DFG pseudo dihedral, etc.) and visualizations were produced using PyMOL (*Schrödinger, LLC,*  
487 **2015**). The contact network analysis was conducted using the open source code developed by Yao  
488 and Hamelberg (<https://github.com/The-Hamelberg-Group/dcna>) (*Yao et al., 2018*). Unless otherwise  
489 noted, the last three μs trajectory frames were used for analysis. All probability distributions were  
490 created by combining the last three μs of each replica for each system, with each distribution con-  
491 sisting of 50 bins. Unless specified, distributions contain quantities from both protomers in dimeric  
492 simulations.

#### 493 **Data Availability**

494 The MD simulation input files and analysis scripts are freely downloadable from [https://github.com/](https://github.com/JanaShenLab/RAF/)  
495 [JanaShenLab/RAF/](https://github.com/JanaShenLab/RAF/). The raw MD trajectories are available upon request.

## 496 Acknowledgement

497 Funding support by the National Cancer Institute to J.S. (R01CA256557) and E.G. (R01CA238229) is  
498 acknowledged.

## 499 References

- 500 **Adamopoulos C**, Ahmed TA, Tucker MR, Ung PMU, Xiao M, Karoulia Z, Amabile A, Wu X, Aaronson SA, Ang C,  
501 Rebecca VW, Brown BD, Schlessinger A, Herlyn M, Wang Q, Shaw DE, Poulikakos PI. Exploiting Allosteric Prop-  
502 erties of RAF and MEK Inhibitors to Target Therapy-Resistant Tumors Driven by Oncogenic BRAF Signaling.  
503 *Cancer Discov.* 2021 Jul; 11(7):1716–1735. doi: [10.1158/2159-8290.CD-20-1351](https://doi.org/10.1158/2159-8290.CD-20-1351).
- 504 **Brooks BR**, Brooks III CL, MacKerell Jr AD, Nilsson L, Petrella RJ, Roux B, Won Y, Archontis G, Bartels C, Boresch  
505 S, Caflisch A, Caves L, Cui Q, Dinner AR, Feig M, Fischer S, Gao J, Hodoscek M, Im W, Kuczera K, et al. CHARMM:  
506 The Biomolecular Simulation Program. *J Comput Chem.* 2009 Jul; 30(10):1545–1614. doi: [10.1002/jcc.21287](https://doi.org/10.1002/jcc.21287).
- 507 **Case DA**, Ben-Shalom IY, Brozell SR, Cerutti DS, Cheatham TE III, Cruzeiro VWD, Darden TA, Duke RE, Ghoreishi  
508 D, Gilson MK, Gohlke H, Goetz AW, Greene D, Harris RC, Homeyer N, Huang Y, Izadi S, Kovalenko A, Kurtzman  
509 T, Lee TS, et al., AMBER 2020; 2020.
- 510 **Cook FA**, Cook SJ. Inhibition of RAF Dimers: It Takes Two to Tango. *Biochem Soc Trans.* 2021 Feb; 49(1):237–251.  
511 doi: [10.1042/BST20200485](https://doi.org/10.1042/BST20200485).
- 512 **Cotto-Rios XM**, Agianian B, Gitego N, Zacharioudakis E, Giricz O, Wu Y, Zou Y, Verma A, Poulikakos PI, Ga-  
513 vathiotis E. Inhibitors of BRAF Dimers Using an Allosteric Site. *Nat Commun.* 2020 Dec; 11(1):4370. doi:  
514 [10.1038/s41467-020-18123-2](https://doi.org/10.1038/s41467-020-18123-2).
- 515 **Darden T**, York D, Pedersen L. Particle Mesh Ewald: An  $W \log(N)$  Method for Ewald Sums in Large Systems. *J*  
516 *Chem Phys.* 1993; 98(12):4. doi: [10.1063/1.464397](https://doi.org/10.1063/1.464397).
- 517 **Feller SE**, Zhang Y, Pastor RW, Brooks BR. Constant Pressure Molecular Dynamics Simulation: The Langevin  
518 Piston Method. *The Journal of Chemical Physics.* 1995 Sep; 103(11):4613–4621. doi: [10.1063/1.470648](https://doi.org/10.1063/1.470648).
- 519 **Grasso M**, Estrada MA, Ventocilla C, Samanta M, Maksimoska J, Villanueva J, Winkler JD, Marmorstein R. Chemi-  
520 cally Linked Vemurafenib Inhibitors Promote an Inactive BRAF<sup>V600E</sup> Conformation. *ACS Chem Biol.* 2016 Oct;  
521 11(10):2876–2888. doi: [10.1021/acschembio.6b00529](https://doi.org/10.1021/acschembio.6b00529).
- 522 **Harris JA**, Liu R, Martins de Oliveira V, Vázquez-Montelongo EA, Henderson JA, Shen J. GPU-Accelerated All-  
523 Atom Particle-Mesh Ewald Continuous Constant pH Molecular Dynamics in Amber. *J Chem Theory Comput.*  
524 2022 Dec; 18(12):7510–7527. doi: [10.1021/acs.jctc.2c00586](https://doi.org/10.1021/acs.jctc.2c00586).
- 525 **Hatzivassiliou G**, Song K, Yen I, Brandhuber BJ, Anderson DJ, Alvarado R, Ludlam MJC, Stokoe D, Gloor SL, Vigers  
526 G, Morales T, Aliagas I, Liu B, Sideris S, Hoefflich KP, Jaiswal BS, Seshagiri S, Koeppen H, Belvin M, Friedman  
527 LS, et al. RAF Inhibitors Prime Wild-Type RAF to Activate the MAPK Pathway and Enhance Growth. *Nature.*  
528 2010 Mar; 464(7287):431–435. doi: [10.1038/nature08833](https://doi.org/10.1038/nature08833).
- 529 **Henderson JA**, Lui R, Harris JA, Huang Y, de Oliviera VM, Shen J. A Guide to the Continuous Constant pH  
530 Molecular Dynamics Methods in Amber and CHARMM [Article v1.0]. *Liv J Comput Mol Sci.* 2022; 4(1):1563.  
531 doi: [10.33011/livecoms.4.1.1563](https://doi.org/10.33011/livecoms.4.1.1563).
- 532 **Henderson JA**, Verma N, Harris RC, Liu R, Shen J. Assessment of Proton-Coupled Conformational Dynamics  
533 of SARS and MERS Coronavirus Papain-like Proteases: Implication for Designing Broad-Spectrum Antiviral  
534 Inhibitors. *J Chem Phys.* 2020 Sep; 153(11):115101. doi: [10.1063/5.0020458](https://doi.org/10.1063/5.0020458).
- 535 **Hopkins CW**, Le Grand S, Walker RC, Roitberg AE. Long-Time-Step Molecular Dynamics through Hydro-  
536 gen Mass Repartitioning. *Journal of Chemical Theory and Computation.* 2015 Apr; 11(4):1864–1874. doi:  
537 [10.1021/ct5010406](https://doi.org/10.1021/ct5010406).
- 538 **Jorgensen WL**, Chandrasekhar J, Madura JD. Comparison of Simple Potential Functions for Simulating Liquid  
539 Water. *J Chem Phys.* 1983 Apr; 79(2):926. doi: [10.1063/1.445869](https://doi.org/10.1063/1.445869).
- 540 **Kanev GK**, de Graaf C, Westerman BA, de Esch IJP, Kooistra AJ. KLIFS: An Overhaul after the First 5 Years of  
541 Supporting Kinase Research. *Nucleic Acids Res.* 2020 Oct; p. gkaa895. doi: [10.1093/nar/gkaa895](https://doi.org/10.1093/nar/gkaa895).
- 542 **Karoulia Z**, Gavathiotis E, Poulikakos PI. New Perspectives for Targeting RAF Kinase in Human Cancer. *Nat Rev*  
543 *Cancer.* 2017 Nov; 17(11):676–691. doi: [10.1038/nrc.2017.79](https://doi.org/10.1038/nrc.2017.79).

- 544 **Karoulia Z**, Wu Y, Ahmed TA, Xin Q, Bollard J, Krepler C, Wu X, Zhang C, Bollag G, Herlyn M, Fagin JA, Lujambio  
545 A, Gavathiotis E, Poulikakos PI. An Integrated Model of RAF Inhibitor Action Predicts Inhibitor Activity against  
546 Oncogenic BRAF Signaling. *Cancer Cell*. 2016 Sep; 30(3):485–498. doi: [10.1016/j.ccell.2016.06.024](https://doi.org/10.1016/j.ccell.2016.06.024).
- 547 **King AJ**, Patrick DR, Batorsky RS, Ho ML, Do HT, Zhang SY, Kumar R, Rusnak DW, Takle AK, Wilson DM, Hugger E,  
548 Wang L, Karreth F, Loughheed JC, Lee J, Chau D, Stout TJ, May EW, Rominger CM, Schaber MD, et al. Demonstra-  
549 tion of a Genetic Therapeutic Index for Tumors Expressing Oncogenic BRAF by the Kinase Inhibitor SB-590885.  
550 *Cancer Res*. 2006 Nov; 66(23):11100–11105. doi: [10.1158/0008-5472.CAN-06-2554](https://doi.org/10.1158/0008-5472.CAN-06-2554).
- 551 **Kooistra AJ**, Kanev GK, van Linden OPJ, Leurs R, de Esch IJP, de Graaf C. KLIFS: A Structural Kinase-Ligand  
552 Interaction Database. *Nucleic Acids Res*. 2016 Jan; 44(D1):D365–D371.
- 553 **Lavoie H**, Gagnon J, Therrien M. ERK Signalling: A Master Regulator of Cell Behaviour, Life and Fate. *Nat Rev*  
554 *Mol Cell Biol*. 2020 Oct; 21(10):607–632. doi: [10.1038/s41580-020-0255-7](https://doi.org/10.1038/s41580-020-0255-7).
- 555 **Lavoie H**, Thevakumaran N, Gavory G, Li JJ, Padeganeh A, Guiral S, Duchaine J, Mao DYL, Bouvier M, Sicheri F,  
556 Therrien M. Inhibitors That Stabilize a Closed RAF Kinase Domain Conformation Induce Dimerization. *Nat*  
557 *Chem Biol*. 2013 Jul; 9(7):428–436. doi: [10.1038/nchembio.1257](https://doi.org/10.1038/nchembio.1257).
- 558 **Liao JLL**. Molecular Recognition of Protein Kinase Binding Pockets for Design of Potent and Selective Kinase  
559 Inhibitors. *J Med Chem*. 2007 Feb; 50(3):409–424. doi: [10.1021/jm0608107](https://doi.org/10.1021/jm0608107).
- 560 **Maier J**, Martinez C, Kasavajhala K, Wickstrom L, Hauser KE, Simmerling C. ff14SB: Improving the Accuracy of  
561 Protein Side Chain and Backbone Parameters from ff99SB. *Journal of Chemical Theory and Computation*.  
562 2015 Jun; 11(8):3696–3713. doi: [10.1021/acs.jctc.5b00255](https://doi.org/10.1021/acs.jctc.5b00255).
- 563 **Maloney RC**, Zhang M, Jang H, Nussinov R. The Mechanism of Activation of Monomeric B-Raf V600E. *Comput*  
564 *Struct Biotechnol J*. 2021; 19:3349–3363. doi: [10.1016/j.csbj.2021.06.007](https://doi.org/10.1016/j.csbj.2021.06.007).
- 565 **Möbitz H**. The ABC of Protein Kinase Conformations. *Biochim Biophys Acta*. 2015 Oct; 1854(10):1555–1566.  
566 doi: [10.1016/j.bbapap.2015.03.009](https://doi.org/10.1016/j.bbapap.2015.03.009).
- 567 **Monaco KA**, Delach S, Yuan J, Mishina Y, Fordjour P, Labrot E, McKay D, Guo R, Higgins S, Wang HQ, Liang J, Bui  
568 K, Green J, Aspesi P, Ambrose J, Mapa F, Griner L, Jaskelioff M, Fuller J, Crawford K, et al. LXH254, a Potent and  
569 Selective ARAF-Sparing Inhibitor of BRAF and CRAF for the Treatment of MAPK-Driven Tumors. *Clin Cancer*  
570 *Res*. 2021 Apr; 27(7):2061–2073. doi: [10.1158/1078-0432.CCR-20-2563](https://doi.org/10.1158/1078-0432.CCR-20-2563).
- 571 **Peng SB**, Henry JR, Kaufman MD, Lu WP, Smith BD, Vogeti S, Rutkoski TJ, Wise S, Chun L, Zhang Y, Van Horn  
572 RD, Yin T, Zhang X, Yadav V, Chen SH, Gong X, Ma X, Webster Y, Buchanan S, Mochalkin I, et al. Inhibition of  
573 RAF Isoforms and Active Dimers by LY3009120 Leads to Anti-tumor Activities in RAS or BRAF Mutant Cancers.  
574 *Cancer Cell*. 2015 Sep; 28(3):384–398. doi: [10.1016/j.ccell.2015.08.002](https://doi.org/10.1016/j.ccell.2015.08.002).
- 575 **Poulikakos PI**, Persaud Y, Janakiraman M, Kong X, Ng C, Moriceau G, Shi H, Atefi M, Titz B, Gabay MT, Salton M,  
576 Dahlman KB, Tadi M, Wargo JA, Flaherty KT, Kelley MC, Misteli T, Chapman PB, Sosman JA, Graeber TG, et al.  
577 RAF Inhibitor Resistance Is Mediated by Dimerization of Aberrantly Spliced BRAF(V600E). *Nature*. 2011 Dec;  
578 480(7377):387–390. doi: [10.1038/nature10662](https://doi.org/10.1038/nature10662).
- 579 **Poulikakos PI**, Zhang C, Bollag G, Shokat KM, Rosen N. RAF Inhibitors Transactivate RAF Dimers and ERK  
580 Signalling in Cells with Wild-Type BRAF. *Nature*. 2010 Mar; 464(7287):427–430. doi: [10.1038/nature08902](https://doi.org/10.1038/nature08902).
- 581 **Rajakulendran T**, Sahmi M, Lefrançois M, Sicheri F, Therrien M. A Dimerization-Dependent Mechanism Drives  
582 RAF Catalytic Activation. *Nature*. 2009 Sep; 461(7263):542–545. doi: [10.1038/nature08314](https://doi.org/10.1038/nature08314).
- 583 **Rasmussen DM**, Semonis MM, Greene JT, Muretta JM, Thompson AR, Ramos ST, Thomas DD, Pomerantz WCK,  
584 Freedman TS, Levinson NM. Allosteric Coupling Asymmetry Mediates Paradoxical Activation of BRAF by Type  
585 II Inhibitors. *Biophysics*; 2023.
- 586 **Roe DR**, Cheatham TE. PTRAJ and CPPTRAJ: Software for Processing and Analysis of Molecular Dynamics Trajec-  
587 tory Data. *Journal of Chemical Theory and Computation*. 2013 Jul; 9(7):3084–3095. doi: [10.1021/ct400341p](https://doi.org/10.1021/ct400341p).
- 588 **Samatar AA**, Poulikakos PI. Targeting RAS–ERK Signalling in Cancer: Promises and Challenges. *Nat Rev Drug*  
589 *Discov*. 2014 Dec; 13(12):928–942. doi: [10.1038/nrd4281](https://doi.org/10.1038/nrd4281).
- 590 **Schrödinger, LLC**. The PyMOL Molecular Graphics System, Version 1.8; 2015.
- 591 **Sultan MM**, Kiss G, Pande VS. Towards Simple Kinetic Models of Functional Dynamics for a Kinase Subfamily.  
592 *Nature Chemistry*. 2018 Sep; 10(9):903–909. doi: [10.1038/s41557-018-0077-9](https://doi.org/10.1038/s41557-018-0077-9).

- 593 **Thevakumaran N**, Lavoie H, Critton DA, Tebben A, Marinier A, Sicheri F, Therrien M. Crystal Structure of a BRAF  
594 Kinase Domain Monomer Explains Basis for Allosteric Regulation. *Nat Struct Mol Biol.* 2015 Jan; 22(1):37–43.  
595 doi: [10.1038/nsmb.2924](https://doi.org/10.1038/nsmb.2924).
- 596 **Tkacik E**, Li K, Gonzalez-Del Pino G, Ha BH, Vinals J, Park E, Beyett TS, Eck MJ. Structure and RAF Family Kinase Iso-  
597 form Selectivity of Type II RAF Inhibitors Tovorafenib and Naporafenib. *J Biol Chem.* 2023 May; 299(5):104634.  
598 doi: [10.1016/j.jbc.2023.104634](https://doi.org/10.1016/j.jbc.2023.104634).
- 599 **Tsai CC**, Yue Z, Shen J. How Electrostatic Coupling Enables Conformational Plasticity in a Tyrosine Kinase. *J Am*  
600 *Chem Soc.* 2019 Sep; 141(38):15092–15101. doi: [10.1021/jacs.9b06064](https://doi.org/10.1021/jacs.9b06064).
- 601 **Tse A**, Verkhivker GM. Exploring Molecular Mechanisms of Paradoxical Activation in the BRAF Kinase Dimers:  
602 Atomistic Simulations of Conformational Dynamics and Modeling of Allosteric Communication Networks and  
603 Signaling Pathways. *PLoS ONE.* 2016 Nov; 11(11):e0166583. doi: [10.1371/journal.pone.0166583](https://doi.org/10.1371/journal.pone.0166583).
- 604 **Wallace JA**, Shen JK. Continuous Constant pH Molecular Dynamics in Explicit Solvent with pH-Based Replica  
605 Exchange. *J Chem Theory Comput.* 2011 Aug; 7(8):2617–2629. doi: [10.1021/ct200146j](https://doi.org/10.1021/ct200146j).
- 606 **Wang J**, Wolf RM, Caldwell JW, Kollman PA, Case DA. Development and Testing of a General Amber Force Field.  
607 *Journal of Computational Chemistry.* 2004 Jul; 25(9):1157–1174. doi: [10.1002/jcc.20035](https://doi.org/10.1002/jcc.20035).
- 608 **Yao XQ**, Momin M, Hamelberg D. Elucidating Allosteric Communications in Proteins with Difference Con-  
609 tact Network Analysis. *Journal of Chemical Information and Modeling.* 2018 Jul; 58(7):1325–1330. doi:  
610 [10.1021/acs.jcim.8b00250](https://doi.org/10.1021/acs.jcim.8b00250).
- 611 **Yen I**, Shanahan F, Lee J, Hong YS, Shin SJ, Moore AR, Sudhamsu J, Chang MT, Bae I, Dela Cruz D, Hunsaker T, Klijn  
612 C, Liao NPD, Lin E, Martin SE, Modrusan Z, Piskol R, Segal E, Venkatanarayan A, Ye X, et al. ARAF Mutations  
613 Confer Resistance to the RAF Inhibitor Belvarafenib in Melanoma. *Nature.* 2021 Jun; 594(7863):418–423. doi:  
614 [10.1038/s41586-021-03515-1](https://doi.org/10.1038/s41586-021-03515-1).
- 615 **Zhang M**, Maloney R, Jang H, Nussinov R. The Mechanism of Raf Activation through Dimerization. *Chem Sci.*  
616 2021; 12(47):15609–15619. doi: [10.1039/D1SC03444H](https://doi.org/10.1039/D1SC03444H).
